# Supplementary material
Source: HighWire-hosted journal article supplement (https://care.diabetesjournals.org/content/suppl/2008/01/15/dc07-1365)
Supplement: dc071365onlineappendix.pdf [file dc071365onlineappendix.pdf]

## Online Only Appendix

### Evaluation Methods and Operational Definitions Used

| Consensus Criteria                                                            | Sampling Method | Description of Evaluation Criteria and Operational Definitions Used                                                                                                                                                                                                                                                                         |
|-------------------------------------------------------------------------------|-----------------|---------------------------------------------------------------------------------------------------------------------------------------------------------------------------------------------------------------------------------------------------------------------------------------------------------------------------------------------|
| <b>Word Usage, Reading Level, and Sentence Length</b>                         |                 |                                                                                                                                                                                                                                                                                                                                             |
| Scientific jargon is avoided or technical terms explained                     | Whole document  | Throughout the document, scientific jargon is not used unnecessarily. When scientific jargon or terminology (medical, nutrition) are used, these terms are introduced with a definition or explanation that would be considered understandable to a low-literacy population (i.e. falls within low literacy reading grade recommendations). |
| Common words used; multi-syllabic words (more than 2-3 syllables) are avoided | Whole document  | Throughout the document, familiar terms and words with few syllables are substituted for infrequently used words (as determined by Flesch-Kincaid Reading Ease score) or words with >2-3 syllables.                                                                                                                                         |
| Sentence length < 15 words                                                    | Excerpted text  | Number of words per sentence, for each sentence in the three excerpted text sections, is <15.                                                                                                                                                                                                                                               |
| Writing is in active voice                                                    | Excerpted text  | In the three excerpted text sections, <5% of text (1-2 sentences) is passive voice; active vs. passive voice is determined by whether the subject of the verb is doing the action expressed in the verb or receiving the action.                                                                                                            |
| Reading grade level $\leq$ 5 <sup>th</sup> grade (for overall document)       | Excerpted text  | Mean Flesch-Kincaid grade level for the three excerpted text sections is $\leq$ 5 <sup>th</sup> grade.                                                                                                                                                                                                                                      |
| <b>Typography</b>                                                             |                 |                                                                                                                                                                                                                                                                                                                                             |
| Text is in uppercase and lowercase serif (best) or sans-serif                 | Whole document  | Throughout the text, captions, and tables, sentence or title cases are used, and either serif or non-serif font styles are used.                                                                                                                                                                                                            |
| Type size is $\geq$ 12 points                                                 | Whole document  | Type (font) size throughout the body of text (not headers), captions, and tables is no less than 12 points.                                                                                                                                                                                                                                 |
| Sub-headers “chunk” information                                               | Whole document  | For complex topics, information under sub-headers is                                                                                                                                                                                                                                                                                        |

|                                                                                         |                |                                                                                                                                                                                                                                    |
|-----------------------------------------------------------------------------------------|----------------|------------------------------------------------------------------------------------------------------------------------------------------------------------------------------------------------------------------------------------|
|                                                                                         |                | divided into smaller amounts of $\leq 5$ main points or $\leq 5$ items per list, throughout document.                                                                                                                              |
| Typographic cues emphasize key points                                                   | Whole document | Bolding, bullets, or size are used for emphasis at all, anywhere in the document.                                                                                                                                                  |
| Line length is $\leq 30$ -50 characters and spaces                                      | Excerpted text | Count of number of characters with spaces for each line in the three excerpted text sections is $\leq 30$ -50.                                                                                                                     |
| Use of ALL CAPS is avoided                                                              | Whole document | No headers or running text use all capital letters.                                                                                                                                                                                |
| <b>Graphics, Illustrations, and Tables</b>                                              |                |                                                                                                                                                                                                                                    |
| Cover graphic shows purpose of document                                                 | Document cover | Pictures or persons in the cover graphic depict behaviors or the topic of the document rather than a random or unrelated graphic design.                                                                                           |
| Graphics are designed to be simple, age-appropriate                                     | Whole document | Graphics are not cluttered with non-essential, distracting details; graphics depict what is familiar and relevant to the audience; graphics are not presented in an immature or an overly mature manner for the intended audience. |
| Explanatory captions are included with each graphic                                     | Whole document | Throughout the document, graphics are presented with a caption about what is depicted.                                                                                                                                             |
| Illustrations are on the same page adjacent to the related text                         | Whole document | Illustrations throughout the document are located next to the related text.                                                                                                                                                        |
| Illustrations present key messages so reader can grasp key idea from illustration alone | Whole document | Illustrations throughout the document adequately depict the behaviors or topics of the related text to convey the message.                                                                                                         |
| Illustrations are not distracting                                                       | Whole document | Throughout the document, no illustrations are overly busy; illustrations enhance understanding.                                                                                                                                    |
| <b>Layout, Space, and Paper</b>                                                         |                |                                                                                                                                                                                                                                    |
| Layout enables a predictable sequence/flow of information                               | Whole document | Throughout the document, layout of the information follows a logical sequence.                                                                                                                                                     |
| Visual cuing devices (e.g. shading, boxes, arrows) are used to direct attention         | Whole document | A device to visually direct attention is used anywhere in the document.                                                                                                                                                            |
| Adequate white space and line spacing are used to reduce looking cluttered              | Whole document | Throughout the document, margins and spacing between text sections and sections are used to display ample white space; text is displayed in short                                                                                  |

|                                                                        |                |                                                                                                                                                                                                    |
|------------------------------------------------------------------------|----------------|----------------------------------------------------------------------------------------------------------------------------------------------------------------------------------------------------|
|                                                                        |                | lines and text sections.                                                                                                                                                                           |
| Contrast between type and paper is high                                | Whole document | Optimal dark type/light background (black on white) or light text/dark background (white on black) is used throughout document.                                                                    |
| Use of color supports message, not distracting                         | Whole document | Throughout the document, use of color does not overwhelm the message, and readers do not need to learn color coding to follow the message.                                                         |
| Topics are preceded by advanced organizers or headers >50% of the time | Whole document | >50% of the time, a header or other organizing feature is used to alert the reader of what content is presented next.                                                                              |
| <b>Content, Scope, and Organization</b>                                |                |                                                                                                                                                                                                    |
| Scope is limited                                                       | Whole document | <40% of information is non-essential to the identified purpose of document.                                                                                                                        |
| Content is behaviorally-focused                                        |                | ≥ 50% of the content concerns behaviors or behavior recommendations.                                                                                                                               |
| Summary, information overview, or information review is included       | Whole document | A summary of the content is provided either at the beginning (an overview) or end (a review) of the document, or both.                                                                             |
| <b>Engagement, Interaction, and Action Facilitation</b>                |                |                                                                                                                                                                                                    |
| Recommended behaviors are modeled and specific ≥ 50% of the time.      | Whole document | At least half of the time that behaviors are recommended, those behaviors are presented in a step-by-step manner or with examples or specifics to facilitate engaging in the recommended behavior. |
| Questions or activities with records are presented for reader response | Whole document | Any interactive educational tool that permits readers to get involved with the information (e.g. questions for response, checklists, diary/recording lines) is presented anywhere in the document. |
| “How to” information is provided                                       | Whole document | Any information on how to reach a recommended target or behavior is presented anywhere in the document.                                                                                            |
| <b>Audience Relevance and Appropriateness</b>                          |                |                                                                                                                                                                                                    |

|                                                                                            |                |                                                                                                                                            |
|--------------------------------------------------------------------------------------------|----------------|--------------------------------------------------------------------------------------------------------------------------------------------|
| Recommendations are sensible in the context of the audience's culture, values, and beliefs | N/A            | Unable to be evaluated using this review methodology; requires evaluation by intended audience.                                            |
| Language and experience(s) used match those of the intended audience                       | N/A            | Unable to be evaluated using this review methodology; requires evaluation by intended audience.                                            |
| Cultural images and examples are presented in a positive manner                            | Whole document | Images and examples are positive, respectful, and non-offensive, and are free from physical, character-related or situational stereotypes. |

Note: For the excerpted text sampling method (7), three samples of text (from the beginning, middle, and end), totaling about 30 sentences, were systematically extracted from each print brochure.
